# Supplementary material for: Self-diffusion is temperature independent on active membranes
Source: Royal Society of Chemistry journal article supplement (doi:10.1039/d4cp02470b), 2024-01-01
Supplement: d4cp02470b2.pdf [file d4cp02470b2.pdf]

**Supplementary Information: Self-diffusion is temperature  
independent on active membranes**

Saurav G. Varma, Argha Mitra, Sumantra Sarkar

*Department of Physics, Indian Institute of Science, Bengaluru, Karnataka, 560012*

(Dated: May 6, 2024)

## I. CG-MD SIMULATION PROTOCOL

*a. Energy minimization and equilibration:* The system’s energy was minimized using the steepest descent and the conjugate gradients methods in the next step. We ran at least 5000 steps of energy minimization to ensure proper geometry and to minimize steric clashes. Following energy minimization, all systems were subjected to a six-step equilibration protocol (Table: SI), where the stiffness of the positional restraint on the lipid head groups ( $PO_4$  bead of DPPC and DAPC) was in gradually decreased to avoid collapse of the system. Five different temperatures (298, 302, 306, 310, and 314 K) were controlled by velocity-rescale thermostats [1] with a coupling constant of 0.1 ps, which was used. For the equilibration, we used Berendsen barostat [2] with the compressibility of  $4.5 \times 10^{-5} \text{ bar}^{-1}$  semi-isotropic scaling [3, 4].

| Step  | Restraint ( $KJmol^{-1}s^{-1}$ ) | Timestep (fs) | Time (ns) |
|-------|----------------------------------|---------------|-----------|
| 1     | 200                              | 2             | 1         |
| 2     | 100                              | 5             | 1         |
| 3     | 50                               | 10            | 1         |
| 4     | 20                               | 15            | 0.75      |
| 5     | 10                               | 20            | 1         |
| 6     | 2                                | 20            | 50        |
| Total |                                  |               | 54.75     |

TABLE SI. Equilibration Details

*b. Production runs:* For these simulations velocity rescale temperature bath was applied [1]. The pressure was controlled with the Parrinello-Rahman barostat [5] with a 12 ps coupling constant, and the compressibility of  $3 \times 10^{-4} \text{ bar}^{-1}$  [6]. However, due to the longer spatial scale during production, the chance of undulation increases, which was significantly reduced by using a mild positional restraint ( $2 \text{ kJmol}^{-1}\text{nm}^{-1}$ ) on the  $PO_4$  beads in the Z-direction [7, 8]. All the production simulation was conducted for  $5 \mu\text{s}$ , except two pure DPPC systems that were run for  $30 \mu\text{s}$  using GROMACS-2022.2 [9–11] with 20 fs timestep where each 100 ps snapshots were stored for analysis. The cumulative simulation time was 1 ms.

## II. LATTICE MODEL SIMULATION PARAMETERS

| Simulation parameters                                           | Values                                   |
|-----------------------------------------------------------------|------------------------------------------|
| Lattice size ( $L \times L$ )                                   | $100 \times 100$                         |
| Radius of aster ( $R_a$ )                                       | 8                                        |
| Areal density of asters ( $A_{frac}$ )                          | 0.2                                      |
| Mean lifetime of aster remodeling ( $\tau_a$ )                  | 10                                       |
| Equilibration steps                                             | 500 steps                                |
| Time to reach steady state                                      | 1000 steps                               |
| Production run                                                  | 18500 steps                              |
| No. of replicas for each ( $T$ )                                | 40                                       |
| Probability to move towards aster core (passive lipids) ( $p$ ) | 0.8                                      |
| Temperatures ( $T$ )                                            | 281 - 321K (spacing = 3K)                |
| Binding probability of ACS to PM ( $p_b$ )                      | 0.0 - 1.0 (spacing = 0.2)                |
| Interaction strength of LJ ( $J/k_B T$ at T=293 K)              | 1/1.43 (like lipids) & 0 (unlike lipids) |
| LJ interaction cutoff radius                                    | $2.5\sigma$                              |
| 1 lattice unit                                                  | $2^{1/6}\sigma$                          |

TABLE SII. The mesoscopic lattice model simulation is performed on a 2D square lattice of size  $L \times L$  with periodic boundary conditions. The lattice sites are occupied with either passive or inert lipids in equal ratios. All spatial parameters are in the units of lattice constant and time scales are in the units of MC steps. 1 lattice unit ( $\sigma_d$ ) =  $2.5/100 \mu\text{m}$  [12] and 1 MC step ( $\tau_d$ ) =  $\frac{\sigma_d^2}{4D} = 0.446$  ms, where  $D \sim 14 \mu\text{m}^2\text{s}^{-1}$  is the typical diffusivity value from our CG-MD simulations.

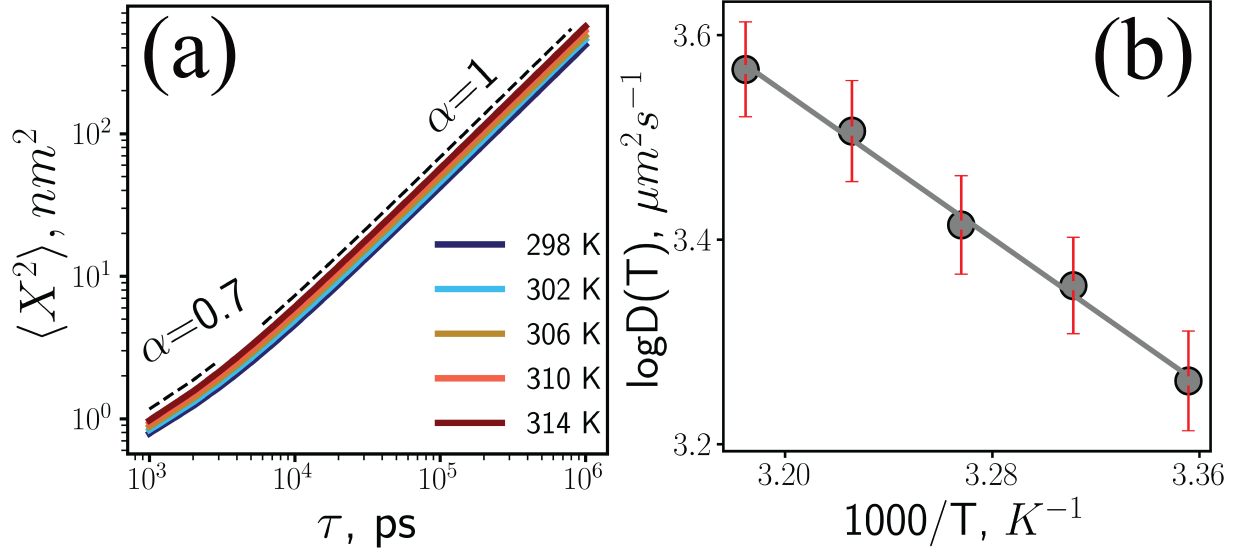

FIG. S1. In equilibrium, DAPC lipids show diffusive behavior, and the diffusion coefficient follows Arrhenius kinetics. (a-b) MSD ( $\langle X^2 \rangle$ ) and diffusivity (semilog scale) of pure DAPC membrane at different  $T$  (298 K - 314 K). All the results from long-timescale simulations. Error bars are the standard deviation of 10 replicates.

### III. MOVIE DETAILS

Movie: "displace\_with\_activity.mp4" shows the active dynamics of lipids on a lattice at 311 K. The passive lipid densities are shown in red and the inert lipid densities are shown in blue. Passive tracer lipid tracks are shown in maroon and inert tracer lipid tracks are in blue. Asters are marked by black circles.

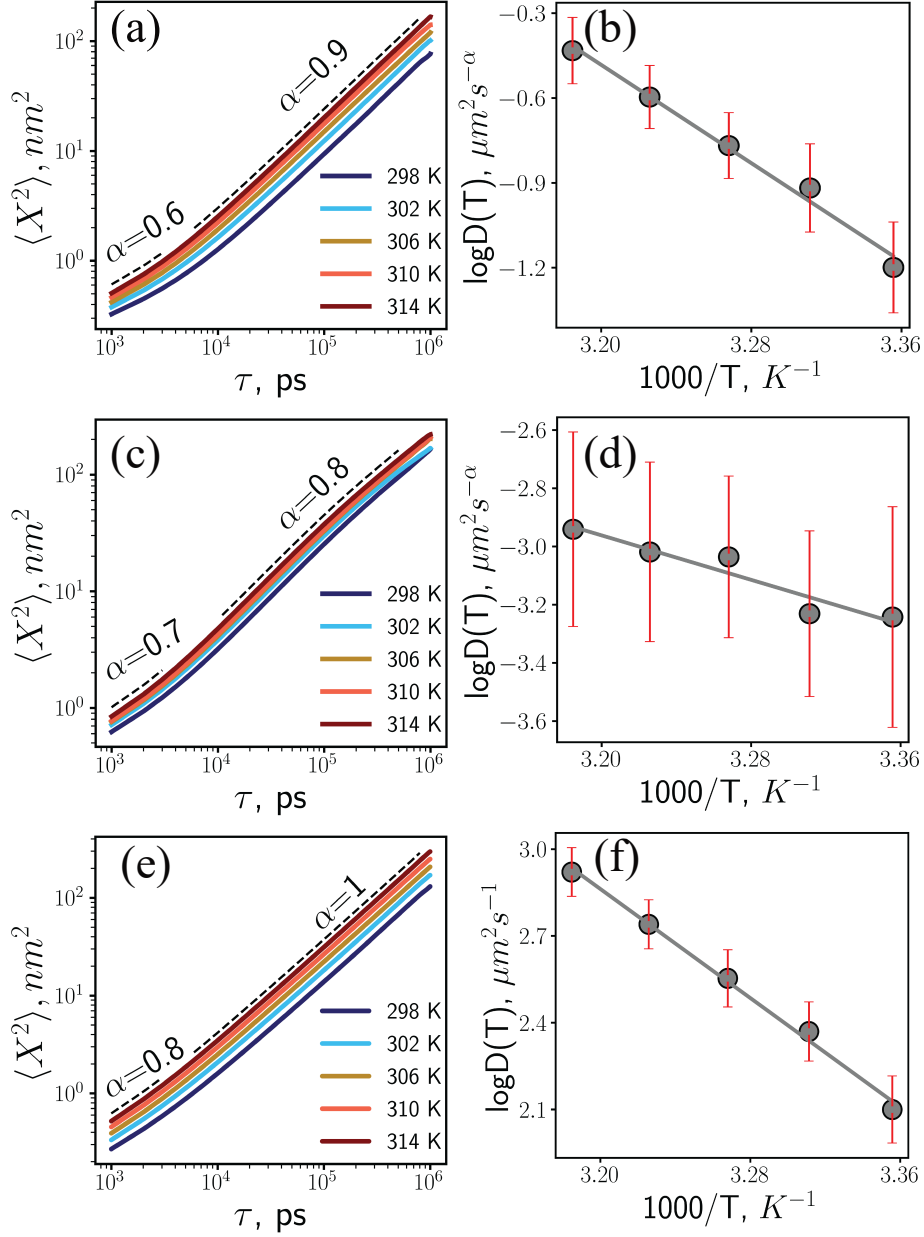

FIG. S2. In equilibrium, mixed model PC lipids show subdiffusive behavior (For DPPC,  $\alpha = 0.9$  and DAPC,  $\alpha = 0.8$ ) and CHOL shows diffusive behavior. MSD ( $\langle X^2 \rangle$ ) and transport coefficient (semilog scale) of DPPC (a-b), DAPC (c-d), and for CHOL (e-f) in the mixed model membrane at different  $T$  (298 K - 314 K). All the results from long-timescale simulations. Error bars are the standard deviation of 12 replicates.

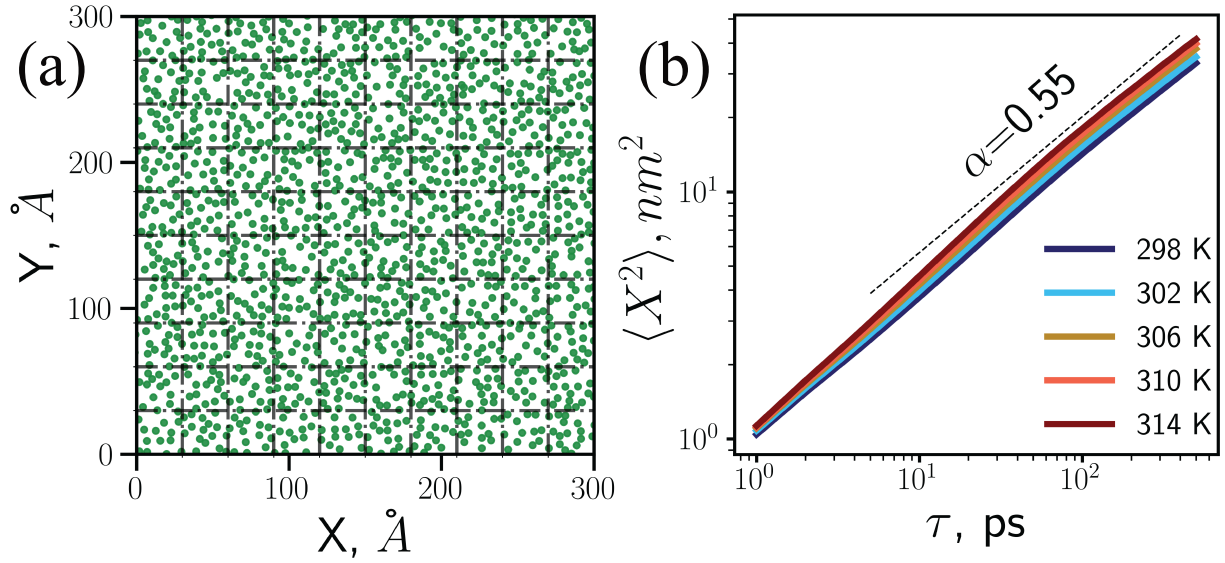

FIG. S3. Nanoscale simulation system snapshot and MSD. (a) Snapshot  $PO_4$  groups of DPPC at 314 K (each grid =  $3 \times 3$  nm). (b) MSD ( $\langle X^2 \rangle$ ) averaged over grids at different  $T$  (298 K - 314 K).

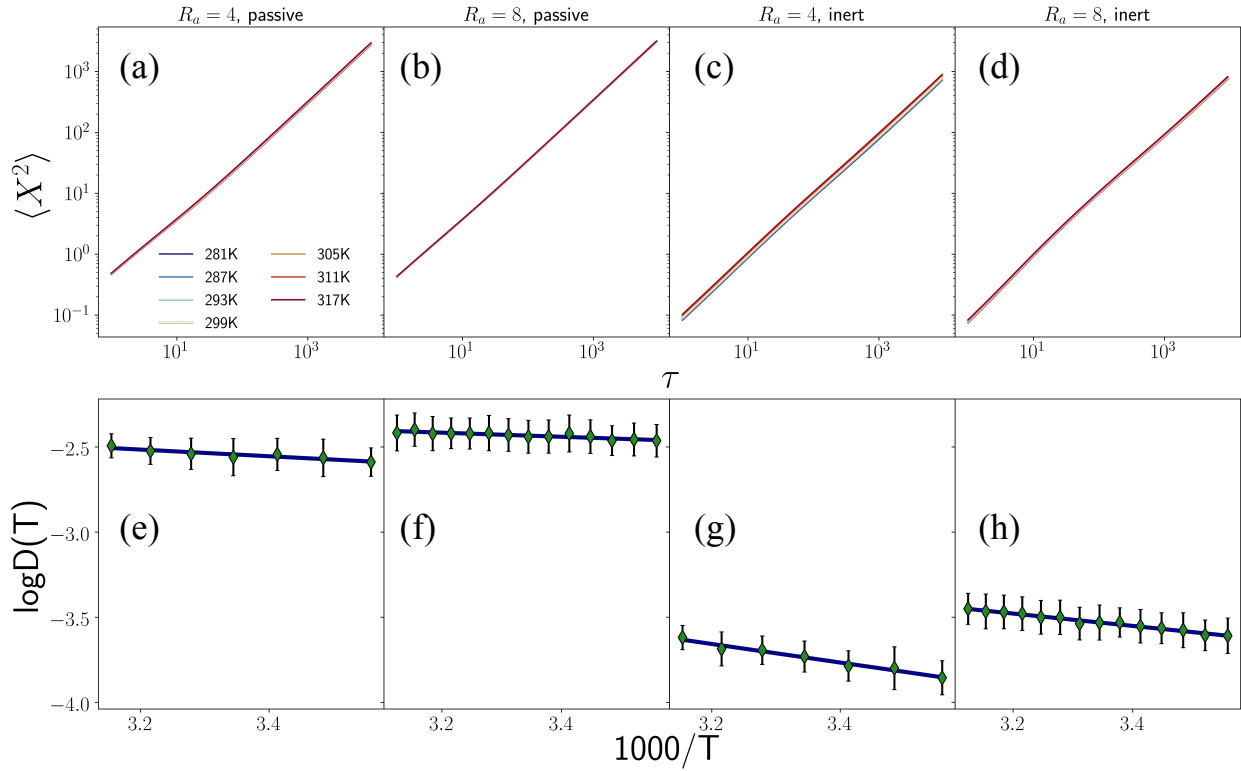

FIG. S4. Change in aster radius has no effect on diffusive behavior of lipids. The data from two different sizes of asters ( $R_a = 4$  and 8) is compared in (a)-(h) for passive and inert lipids.

- 
- [S1] G. Bussi, D. Donadio, and M. Parrinello, Canonical sampling through velocity rescaling, *The Journal of chemical physics* **126** (2007).
- [S2] H. J. Berendsen, J. v. Postma, W. F. Van Gunsteren, A. DiNola, and J. R. Haak, Molecular dynamics with coupling to an external bath, *The Journal of chemical physics* **81**, 3684 (1984).
- [S3] S. J. Marrink, H. J. Risselada, S. Yefimov, D. P. Tieleman, and A. H. De Vries, The martini force field: coarse grained model for biomolecular simulations, *The journal of physical chemistry B* **111**, 7812 (2007).
- [S4] S. J. Marrink and D. P. Tieleman, Perspective on the martini model, *Chemical Society Reviews* **42**, 6801 (2013).
- [S5] M. Parrinello and A. Rahman, Polymorphic transitions in single crystals: A new molecular dynamics method, *Journal of Applied physics* **52**, 7182 (1981).
- [S6] D. H. De Jong, S. Baoukina, H. I. Ingólfsson, and S. J. Marrink, Martini straight: Boosting performance using a shorter cutoff and gpus, *Computer Physics Communications* **199**, 1 (2016).
- [S7] H. I. Ingólfsson, M. N. Melo, F. J. Van Eerden, C. Arnarez, C. A. Lopez, T. A. Wassenaar, X. Periole, A. H. De Vries, D. P. Tieleman, and S. J. Marrink, Lipid organization of the plasma membrane, *Journal of the american chemical society* **136**, 14554 (2014).
- [S8] H. I. Ingólfsson, T. S. Carpenter, H. Bhatia, P.-T. Bremer, S. J. Marrink, and F. C. Lightstone, Computational lipidomics of the neuronal plasma membrane, *Biophysical journal* **113**, 2271 (2017).
- [S9] D. Van Der Spoel, E. Lindahl, B. Hess, G. Groenhof, A. E. Mark, and H. J. Berendsen, Gromacs: fast, flexible, and free, *Journal of computational chemistry* **26**, 1701 (2005).
- [S10] H. Bekker, H. Berendsen, E. Dijkstra, S. Achterop, R. v. Vondrumen, D. Vanderspoel, A. Sijbers, H. Keegstra, and M. Renardus, Gromacs-a parallel computer for molecular-dynamics simulations, in *4th international conference on computational physics (PC 92)* (World Scientific Publishing, 1993) pp. 252–256.
- [S11] M. J. Abraham, T. Murtola, R. Schulz, S. Páll, J. C. Smith, B. Hess, and E. Lindahl, Gromacs: High performance molecular simulations through multi-level parallelism from laptops to supercomputers, *SoftwareX* **1**, 19 (2015).

[S12] A. Das, A. Polley, and M. Rao, Phase segregation of passive advective particles in an active medium, [Physical Review Letters](#) **116**, 068306 (2016).
